# Supplementary material for: Impact of HBsAg and HBcrAg levels on phenotype and function of HBV-specific T cells in patients with chronic hepatitis B virus infection
Source: HighWire-hosted journal article supplement (doi:10.1136/gutjnl-2021-324646), 2021-10-26

Figure S4

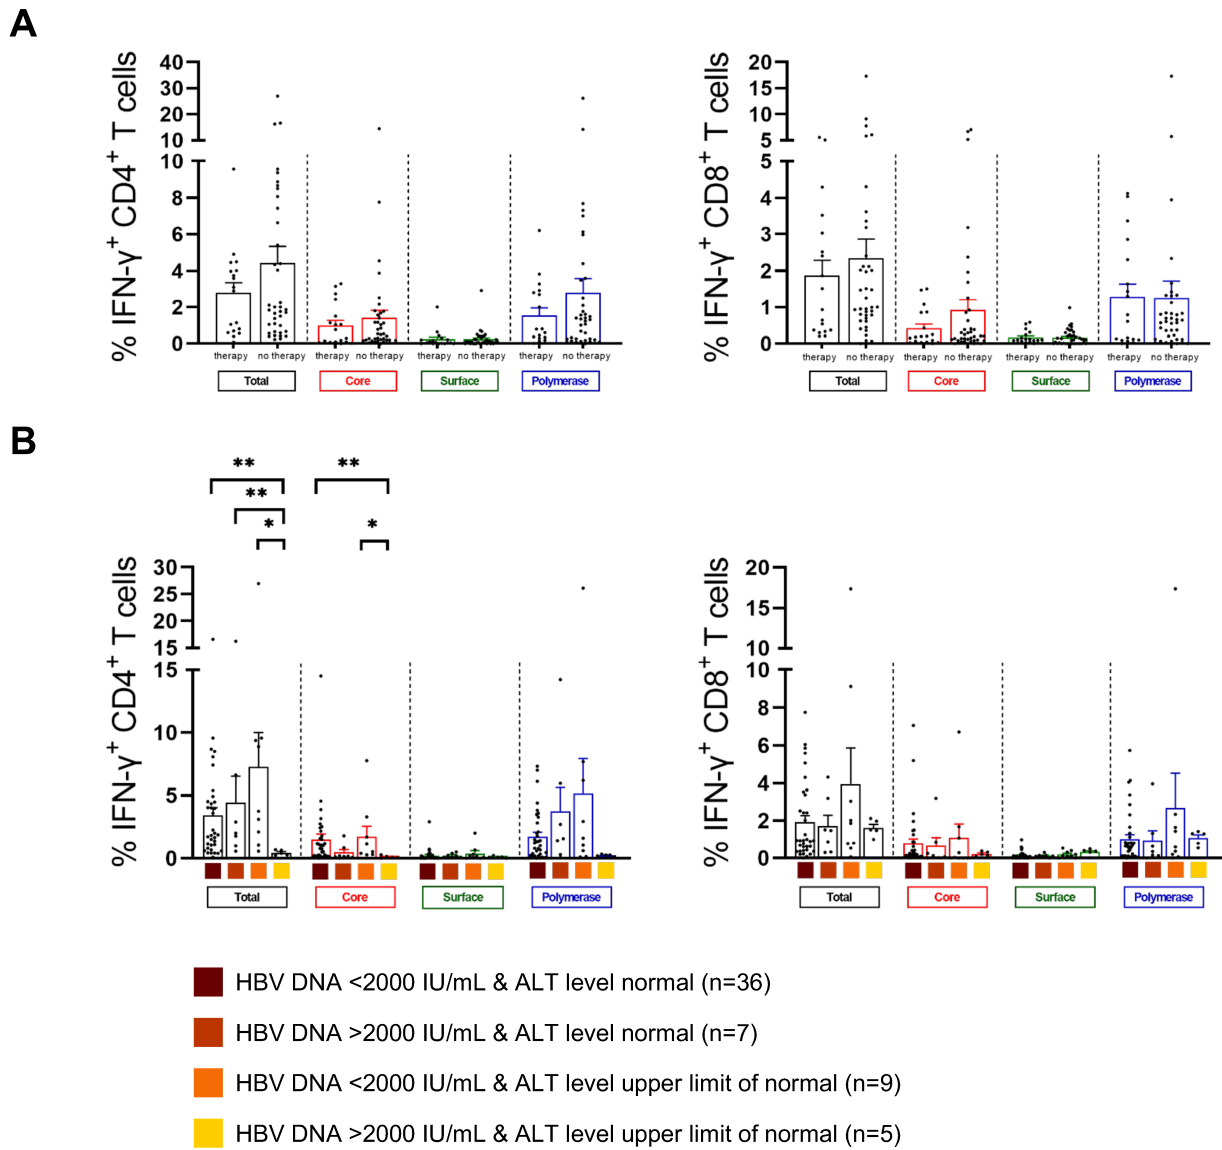

Supplement: gutjnl-2021-324646supp006_data_supplement.pdf [file gutjnl-2021-324646supp006_data_supplement.pdf]
